# Supplementary material
Source: HighWire-hosted journal article supplement (https://bmjopen.bmj.com/content/9/10/e030593)
Supplement: inline-supplementary-material-3 [file inline-supplementary-material-3.pdf]

## Supplemental File 3 – Detailed Search Strategies for Web of Science, Embase, MEDLINE, PubMed and CINAHL

### Web of Science

#### Search History:

| Set | Results   |                                                                                                                                                                                       |
|-----|-----------|---------------------------------------------------------------------------------------------------------------------------------------------------------------------------------------|
|     |           | <input type="button" value="Save History / Create Alert"/> <input type="button" value="Open Saved History"/>                                                                          |
| # 7 | 1,027     | #6 AND #5 AND #4<br><i>Indexes=SCI-EXPANDED, SSCI, A&amp;HCI, CPCI-S, CPCI-SSH, ESCI Timespan=1995-2019</i>                                                                           |
| # 6 | 9,703,534 | TS=(systems OR network OR tool OR communication OR notification OR "information exchange")<br><i>Indexes=SCI-EXPANDED, SSCI, A&amp;HCI, CPCI-S, CPCI-SSH, ESCI Timespan=1995-2019</i> |
| # 5 | 806,837   | TS=(international OR multi-state OR multi-country OR imported OR exported)<br><i>Indexes=SCI-EXPANDED, SSCI, A&amp;HCI, CPCI-S, CPCI-SSH, ESCI Timespan=1995-2019</i>                 |
| # 4 | 32,199    | #3 OR #2 OR #1<br><i>Indexes=SCI-EXPANDED, SSCI, A&amp;HCI, CPCI-S, CPCI-SSH, ESCI Timespan=1995-2019</i>                                                                             |
| # 3 | 26,514    | TS=("food safety" OR "food contamination" OR "foodborne diseases")<br><i>Indexes=SCI-EXPANDED, SSCI, A&amp;HCI, CPCI-S, CPCI-SSH, ESCI Timespan=1995-2019</i>                         |
| # 2 | 1,793     | TS=(gastroenteritis NEAR/5 (incident* OR emergenc* OR outbreak*))<br><i>Indexes=SCI-EXPANDED, SSCI, A&amp;HCI, CPCI-S, CPCI-SSH, ESCI Timespan=1995-2019</i>                          |
| # 1 | 5,547     | TS=(food* NEAR/5 (incident* OR emergenc* OR outbreak*))<br><i>Indexes=SCI-EXPANDED, SSCI, A&amp;HCI, CPCI-S, CPCI-SSH, ESCI Timespan=1995-2019</i>                                    |

### Embase and MEDLINE

| <input type="checkbox"/> | # ▲ | Searches                                                                                    | Results |
|--------------------------|-----|---------------------------------------------------------------------------------------------|---------|
| <input type="checkbox"/> | 1   | ▶ (food* adj5 incident*).af.                                                                | 983     |
| <input type="checkbox"/> | 2   | ▶ (food* adj5 emergenc*).af.                                                                | 5617    |
| <input type="checkbox"/> | 3   | ▶ (food* adj5 outbreak*).af.                                                                | 8825    |
| <input type="checkbox"/> | 4   | ▶ (gastroenteritis adj5 incident*).af.                                                      | 54      |
| <input type="checkbox"/> | 5   | ▶ (gastroenteritis adj5 emergenc*).af.                                                      | 1206    |
| <input type="checkbox"/> | 6   | ▶ (gastroenteritis adj5 outbreak*).af.                                                      | 4424    |
| <input type="checkbox"/> | 7   | ▶ ("food safety" or "food contamination" or "foodborne diseases").af.                       | 156116  |
| <input type="checkbox"/> | 8   | ▶ (international or multi-state or multi-country or imported or exported).af.               | 3541525 |
| <input type="checkbox"/> | 9   | ▶ (systems or network or tool or communication or notification or information-exchange).af. | 4810679 |
| <input type="checkbox"/> | 10  | ▶ 1 or 2 or 3                                                                               | 15272   |
| <input type="checkbox"/> | 11  | ▶ 4 or 5 or 6                                                                               | 5640    |
| <input type="checkbox"/> | 12  | ▶ 7 or 10 or 11                                                                             | 170450  |
| <input type="checkbox"/> | 13  | ▶ 8 and 9 and 12                                                                            | 2835    |
| <input type="checkbox"/> | 14  | ▶ limit 13 to yr="1995 -Current"                                                            | 2779    |

## PubMed

| Search | Add to builder      | Query                                                                                                                                                                                                                                                                                                                                                                              | Items found             | Time     |
|--------|---------------------|------------------------------------------------------------------------------------------------------------------------------------------------------------------------------------------------------------------------------------------------------------------------------------------------------------------------------------------------------------------------------------|-------------------------|----------|
| #7     | <a href="#">Add</a> | Search (((systems OR network OR tool OR communication OR notification OR "information exchange")) AND ((international OR multi-state OR multi-country OR imported OR exported))) AND (((("food safety" OR "food contamination" OR "foodborne diseases")) OR ((gastroenteritis AND (incident* OR emergenc* OR outbreak*)))) OR ((food* AND (incident* Or emergenc* OR outbreak*)))) | <a href="#">1062</a>    | 10:27:02 |
| #6     | <a href="#">Add</a> | Search (systems OR network OR tool OR communication OR notification OR "information exchange")                                                                                                                                                                                                                                                                                     | <a href="#">2269385</a> | 10:26:36 |
| #5     | <a href="#">Add</a> | Search (international OR multi-state OR multi-country OR imported OR exported)                                                                                                                                                                                                                                                                                                     | <a href="#">528235</a>  | 10:26:03 |
| #4     | <a href="#">Add</a> | Search (((("food safety" OR "food contamination" OR "foodborne diseases")) OR ((gastroenteritis AND (incident* OR emergenc* OR outbreak*)))) OR ((food* AND (incident* Or emergenc* OR outbreak*))))                                                                                                                                                                               | <a href="#">105011</a>  | 10:25:24 |
| #3     | <a href="#">Add</a> | Search ("food safety" OR "food contamination" OR "foodborne diseases")                                                                                                                                                                                                                                                                                                             | <a href="#">74378</a>   | 10:24:58 |
| #2     | <a href="#">Add</a> | Search (gastroenteritis AND (incident* OR emergenc* OR outbreak*))                                                                                                                                                                                                                                                                                                                 | <a href="#">13879</a>   | 10:24:38 |
| #1     | <a href="#">Add</a> | Search (food* AND (incident* Or emergenc* OR outbreak*))                                                                                                                                                                                                                                                                                                                           | <a href="#">26356</a>   | 10:24:21 |

## CINAHL (with proximity operators; syntax: n5)

| Search ID#                  | Search Terms                                                                                                                                                              | Search Options                          | Actions                                                                                  |
|-----------------------------|---------------------------------------------------------------------------------------------------------------------------------------------------------------------------|-----------------------------------------|------------------------------------------------------------------------------------------|
| <input type="checkbox"/> S7 |  S4 AND S5 AND S6                                                                      | Search modes - Find all my search terms | <a href="#">View Results (79)</a> <a href="#">View Details</a> <a href="#">Edit</a>      |
| <input type="checkbox"/> S6 |  systems OR network OR tool OR communication OR notification OR "information exchange" | Search modes - Find all my search terms | <a href="#">View Results (836,810)</a> <a href="#">View Details</a> <a href="#">Edit</a> |
| <input type="checkbox"/> S5 |  international OR multi-state OR multi-country OR imported OR exported                 | Search modes - Find all my search terms | <a href="#">View Results (125,224)</a> <a href="#">View Details</a> <a href="#">Edit</a> |
| <input type="checkbox"/> S4 |  S1 OR S2 OR S3                                                                        | Search modes - Find all my search terms | <a href="#">View Results (6,148)</a> <a href="#">View Details</a> <a href="#">Edit</a>   |
| <input type="checkbox"/> S3 |  "food safety" OR "food contamination" OR "foodborne diseases"                         | Search modes - Find all my search terms | <a href="#">View Results (5,155)</a> <a href="#">View Details</a> <a href="#">Edit</a>   |
| <input type="checkbox"/> S2 |  gastroenteritis N5 (incident* OR emergenc* OR outbreak*)                              | Search modes - Find all my search terms | <a href="#">View Results (417)</a> <a href="#">View Details</a> <a href="#">Edit</a>     |
| <input type="checkbox"/> S1 |  food* N5 (incident* Or emergenc* OR outbreak*)                                        | Search modes - Find all my search terms | <a href="#">View Results (889)</a> <a href="#">View Details</a> <a href="#">Edit</a>     |
