# Supplementary material
Source: HighWire-hosted journal article supplement (https://bmjopen.bmj.com/content/9/10/e030593)
Supplement: inline-supplementary-material-4 [file inline-supplementary-material-4.pdf]

**Supplemental File 4 - Data Extraction Form**

|                                                                                                                                          |
|------------------------------------------------------------------------------------------------------------------------------------------|
| <b>EndNote Reference Number</b>                                                                                                          |
|                                                                                                                                          |
| <b>Title</b>                                                                                                                             |
|                                                                                                                                          |
| <b>Authors</b>                                                                                                                           |
|                                                                                                                                          |
| <b>Year of publication</b>                                                                                                               |
|                                                                                                                                          |
| <b>Type of document/study</b>                                                                                                            |
|                                                                                                                                          |
| <b>Countries involved (specify where food was produced, where food was distributed, and where illnesses occurred)</b>                    |
|                                                                                                                                          |
| <b>International/regional organizations involved (specify who took a coordinating role)</b>                                              |
|                                                                                                                                          |
| <b>Specific foodborne hazard</b>                                                                                                         |
|                                                                                                                                          |
| <b>Implicated food item (specify how food was implicated, e.g. epidemiologic evidence, laboratory evidence, traceability evidence)</b>   |
|                                                                                                                                          |
| <b>Name and details of communication tool(s) used (including who used the tool and what kind of information was exchanged)</b>           |
|                                                                                                                                          |
| <b>Factors that facilitated the use of the tools (context or mechanisms)</b>                                                             |
|                                                                                                                                          |
| <b>Factors that limited the use of the tool (context or mechanisms)</b>                                                                  |
|                                                                                                                                          |
| <b>Conclusions made by the authors with respect to the use of the tools (related to context, mechanisms or outcomes)</b>                 |
|                                                                                                                                          |
| <b>Recommendations made by the authors with respect to improving international communication during international food safety events</b> |
|                                                                                                                                          |
| <b>Any other contextual factors</b>                                                                                                      |

|                                                                      |
|----------------------------------------------------------------------|
|                                                                      |
| <b>Any other underlying mechanisms</b>                               |
|                                                                      |
| <b>Points of discussion to raise with Expert Reference Committee</b> |
|                                                                      |
